# Supplementary material
Source: publisher figshare collection journal article supplement (https://acs.figshare.com/ndownloader/files/4505326)
Supplement: Supplementary file 1 [file 4505326]

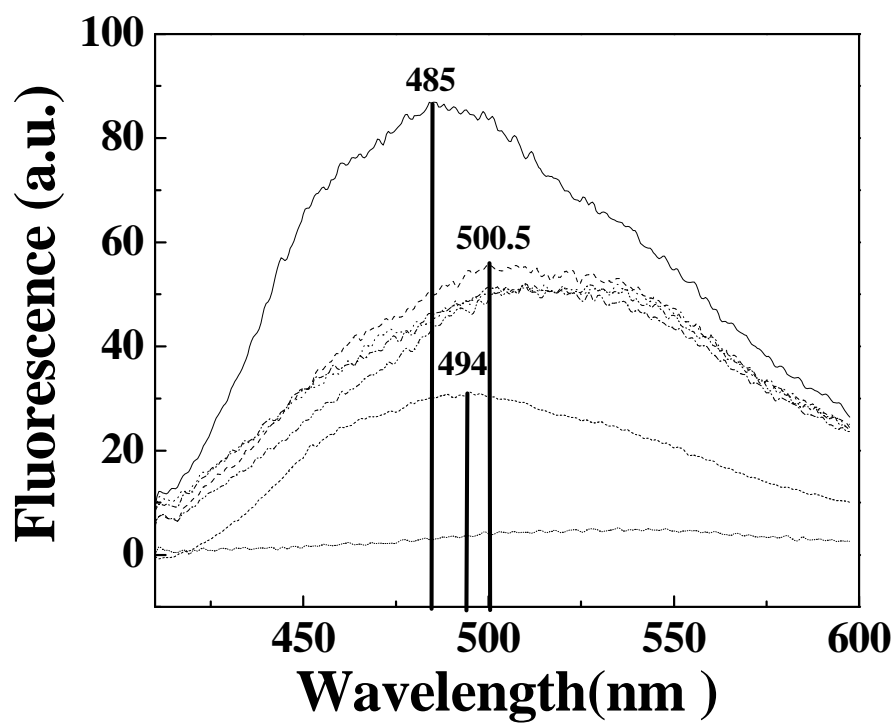

**Supplementary Figure-3**

ANS binding experiment of the BMAP-27, Mu-1 BMAP-27, Mu-2 BMAP-27, Mu-3 BMAP-27, Mu-4 BMAP-27 and SCR-BMAP-27 in PBS. BMAP-27, solid; Mu-1 BMAP-27, dash; Mu2 BMAP-27, dot; Mu-3 BMAP-27, dash dot, Mu-4 BMAP-27, dash dot dot and SCR-BMAP-27, short dash line respectively. Profile of only ANS in PBS shown by short dot. Numerical values at the top of some profile indicate wavelength of emission maxima. ANS concentration was  $\sim 20 \mu\text{M}$  and concentration of each of the peptides was  $\sim 47.0 \mu\text{M}$ . The excitation wavelength was 365 nm and the excitation and emission slits were fixed at 6 and 4 nm respectively.
